# Supplementary material
Source: publisher figshare collection journal article supplement (https://acs.figshare.com/ndownloader/files/3968167)
Supplement: Supplementary file 1 [file 3968167]

## Supporting Information

# Trinuclear and Tetranuclear Magnesium Alkoxide Clusters as Highly Active Initiators for Ring- Opening Polymerization of *L*-Lactide

*Yuan Gao, Zhongran Dai, Jinjin Zhang, Xinxian Ma, Ning Tang, and Jincui Wu\**

Key Laboratory of Nonferrous Metal Chemistry and Resources Utilization of Gansu Province,  
State Key Laboratory of Applied Organic Chemistry, College of Chemistry and Chemical  
Engineering, Lanzhou University, Lanzhou 730000, People's Republic of China

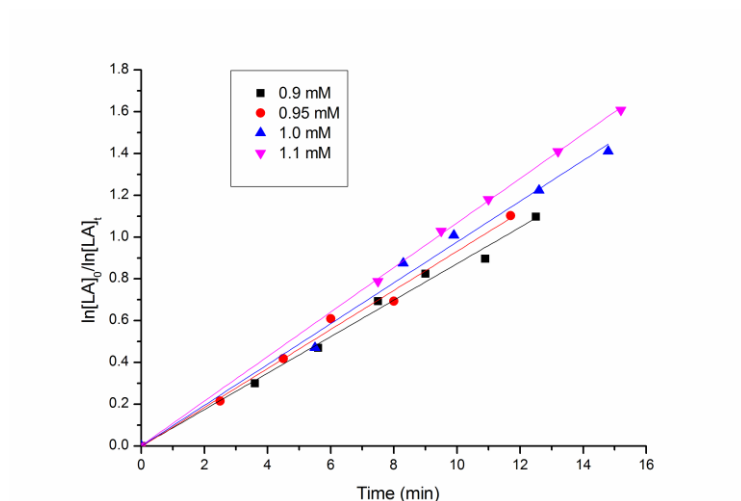

**Figure S1** Plots of  $\ln([LA]_0/[LA]_t)$  versus time using complex 3 as the initiator,  $[LA]_0 = 0.2$  M,  $T = 30$  °C,  $CH_2Cl_2$  (10 mL),  $[3]_0 = 0.9, 0.95, 1.0, 1.1$  mM.

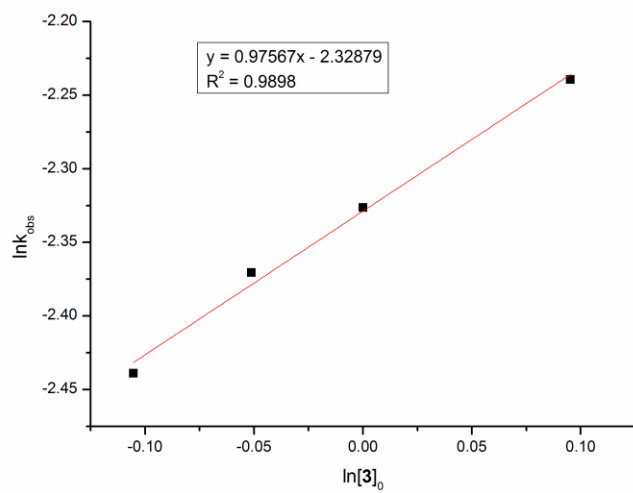

**Figure S2** Plot of  $\ln k_{\text{obs}}$  versus  $\ln[3]_0$  for the polymerization of L-lactide with complex **3** as initiator ( $\text{CH}_2\text{Cl}_2$ , 30 °C,  $[\text{LA}]_0 = 0.2 \text{ M}$ ).

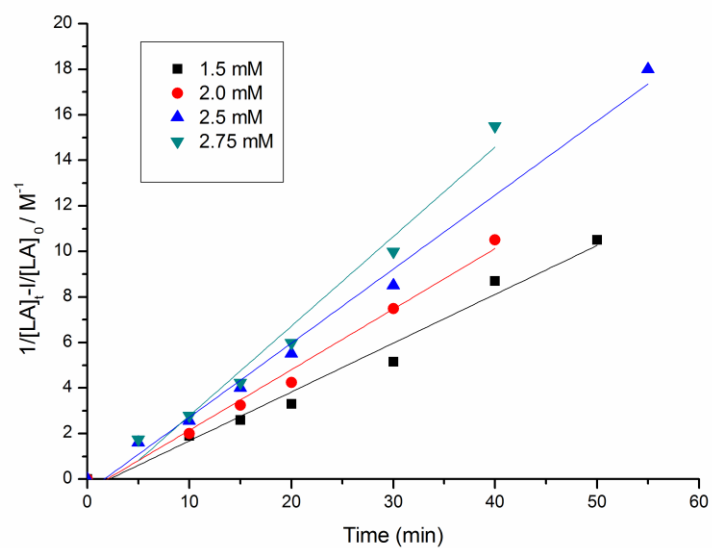

**Figure S3** Plots of  $1/[LA]_t - 1/[LA]_0$  versus time using complex **5** as initiator,  $[LA]_0 = 0.2$  M,  $T = 30$  °C,  $CH_2Cl_2$  (10 mL),  $[5]_0 = 1.5, 2.0, 2.5, 2.75$  mM.

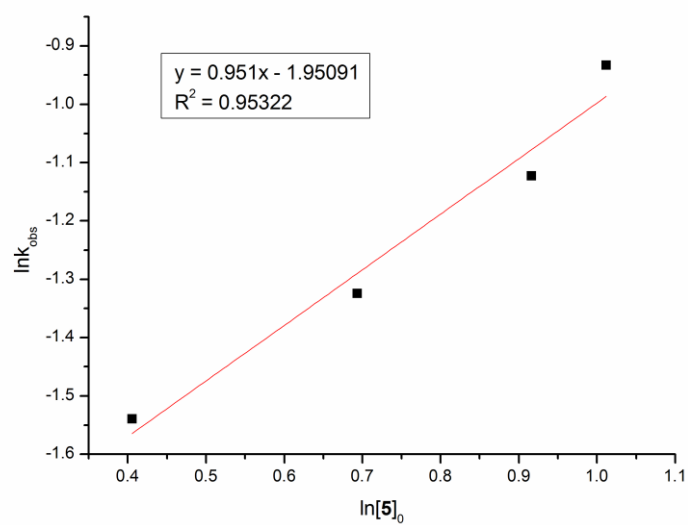

**Figure S4** Plot of  $\ln k_{\text{obs}}$  versus  $\ln[5]_0$  for the polymerization of L-lactide with complex **5** as initiator ( $\text{CH}_2\text{Cl}_2$ , 30 °C,  $[\text{LA}]_0 = 0.2 \text{ M}$ ).
